# Supplementary material for: Rasa3 deficiency minimally affects thrombopoiesis but promotes severe thrombocytopenia due to integrin-dependent platelet clearance
Source: JCI journal article supplement (doi:10.1172/jci.insight.155676), 2022-03-18
Supplement: sd1 [file 1]

You are being redirected.
